# Supplementary material for: Clinical Evaluation of a Custom Gene Panel as a Tool for Precision Male Infertility Diagnosis by Next-Generation Sequencing
Source: PubMed Central journal article supplement (PMC7602585; doi:10.3390/life10100242), 2020-10-15
Supplement: life-10-00242-s001.pdf [file life-10-00242-s001.pdf]

## Supplementary Materials

**Table S1.** Genetic variants identified in the analysed population by NGS. <sup>1</sup>All identified variants are indicated both by cDNA base sequence (third column) and by protein sequence (fourth column) according to the HGVS (Human Genome Variation Society) nomenclature guidelines.<sup>2</sup>Information reported in NCBI (National Centre for Biotechnology Information) database.

| Gene                 | Variant Position             | HGVS <sup>1</sup> Cdna         | HGVS <sup>1</sup> Protein   | Reference ID According To NCBI | Consequence                   | Clinic Relevance <sup>2</sup>         |
|----------------------|------------------------------|--------------------------------|-----------------------------|--------------------------------|-------------------------------|---------------------------------------|
| <i>AR</i>            | chrX:6772287<br>7            | NM_000044.4:c<br>.2500A>T      | NP_000035.2:p.Asn834Tyr     |                                | Missense<br>variant           | -                                     |
| <i>BRD<br/>T</i>     | chr1:9198102<br>2            | NM_001242805<br>.2:c.1594C>T   | NP_001229734.2:p.Arg532Ter  | rs969395495                    | Stop<br>gained                | -                                     |
| <i>C3orf<br/>67</i>  | chr3:5886361<br>7            | NM_001351530<br>.1:c.1369G>A   | NP_001338459.1:p.Val457Met  | rs34631714                     | Missense<br>variant           | -                                     |
| <i>CATS<br/>PER1</i> | chr11:660170<br>59           | NM_053054.3:c<br>.2316+1G>A    |                             |                                | Splice<br>donor<br>variant    | -                                     |
| <i>CCD<br/>C141</i>  | chr2:1789053<br>48           | NM_001316745<br>.1:c.1246A>G   | NP_001303674.1:p.Ser416Gly  | rs748639287                    | Missense<br>variant           | -                                     |
| <i>CCD<br/>C39</i>   | chr3:1806166<br>71           | NM_181426.1:c<br>.2431C>T      | NP_852091.1:p.Arg811Cys     | rs574993914                    | Missense<br>variant           | -                                     |
| <i>CCD<br/>C39</i>   | chr3:1806595<br>82           | NM_181426.1:c<br>.610-2A>G     | -                           | rs756235547                    | Splice<br>acceptor<br>variant | Patho<br>genic                        |
| <i>CCD<br/>C39</i>   | chr3:1806597<br>41           | NM_181426.2:c<br>.545C>G       | NP_852091.1:p.Thr182Ser     | rs112738198                    | Missense<br>variant           | Benig<br>n                            |
| <i>CCD<br/>C40</i>   | chr17:800847<br>42           | NM_017950.3:c<br>.1990-1G>C    | -                           | rs746905855                    | Splice<br>acceptor<br>variant | -                                     |
| <i>CEN<br/>PF</i>    | chr1:2146421<br>28-214642129 | NM_016343.3:c<br>.3792_3793del | NP_057427.3:p.Cys1264Ter    | rs778085976                    | frameshift<br>variant         | -                                     |
| <i>CHD<br/>7</i>     | chr8:6082184<br>2            | NM_017780.3:c<br>.2750C>T      | NP_060250.2:p.Thr917Met     | rs1165711448                   | missense<br>variant           | -                                     |
| <i>DNA<br/>H1</i>    | chr3:5239289<br>6            | NM_015512.4:c<br>.10345G>A     | NP_056327.4:p.Val3449Met    | rs757371106                    | missense<br>variant           | -                                     |
| <i>DNA<br/>H1</i>    | chr3:5237223<br>6            | NM_015512.4:c<br>.6676A>G      | NP_056327.4:p.Ile2226Val    | rs112505934                    | missense<br>variant           | -                                     |
| <i>DNA<br/>H11</i>   | chr7:2169820<br>6            | NM_001277115<br>.1:c.6173C>T   | NP_001264044.1:p.Ser2058Phe | rs765090393                    | missense<br>variant           | Unce<br>rtain<br>signif<br>icanc<br>e |
| <i>DNA<br/>H11</i>   | chr7:2168740<br>8            | NM_001277115<br>.1:c.5805G>C   | NP_001264044.1:p.Leu1935Phe |                                | missense<br>variant           | -                                     |
| <i>DNA<br/>H5</i>    | chr5:1371441<br>2            | NM_001369.2:c<br>.13118C>A     | NP_001360.1:p.Pro4373His    | rs1459001748                   | missense<br>variant           | -                                     |
| <i>DNA<br/>H8</i>    | chr6:3888687<br>0            | NM_001206927<br>.1:c.8339T>C   | NP_001193856.1:p.Ile2780Thr | rs142328376                    | missense<br>variant           | Benig<br>n                            |
| <i>DNA<br/>I1</i>    | chr9:3451741<br>4            | NM_001281428<br>.1:c.1960C>T   | NP_001268357.1:p.Arg654Cys  | rs140820295                    | missense<br>variant           | Unce<br>rtain<br>signif<br>icanc<br>e |
| <i>DNA<br/>I2</i>    | chr17:742998<br>47           | NM_001172810<br>.2:c.854C>T    | NP_001166281.1:p.Thr285Met  | rs141079076                    | missense<br>variant           | Unce<br>rtain<br>signif<br>icanc<br>e |

|                |                    |                                |                                 |              |  |                               |                                                                      |
|----------------|--------------------|--------------------------------|---------------------------------|--------------|--|-------------------------------|----------------------------------------------------------------------|
| <b>DRC1</b>    | chr2:2645059<br>1  | NM_145038.4:c<br>.1600-1G>A    | -                               |              |  | Splice<br>acceptor<br>variant | -                                                                    |
| <b>FGF17</b>   | chr8:2204624<br>9  | NM_003867.3:c<br>.208G>A       | NP_003858.1:p.Gly70Arg          | rs368521586  |  | missense<br>variant           | -                                                                    |
| <b>FLRT3</b>   | chr20:143264<br>01 | NM_198391.2:c<br>.1106C>T      | NP_938205.1:p.Ala369Val         | rs771836971  |  | missense<br>variant           | -                                                                    |
| <b>GLI2</b>    | chr2:1209864<br>80 | NM_005270.4:c<br>.2159G>A      | NP_005261.2:p.Arg720His         | rs149091975  |  | missense<br>variant           | Likel<br>y<br>benig<br>n or<br>Unce<br>rtain<br>signif<br>icanc<br>e |
| <b>HFM1</b>    | chr1:9134345<br>7  | NM_001017975<br>.4:c.2308G>A   | NP_001017975.4:p.Asp770Asn      | rs143399622  |  | missense<br>variant           | Benig<br>n                                                           |
| <b>HFM1</b>    | chr1:9132467<br>4  | NM_001017975<br>.4:c.2427+1G>A | -                               |              |  | Splice<br>donor<br>variant    | -                                                                    |
| <b>HYDIN</b>   | chr16:708720<br>81 | NM_001270974<br>.2:c.11047C>T  | NP_001257903.1:p.Arg3683Trp     | rs200260585  |  | missense<br>variant           | -                                                                    |
| <b>KISS1</b>   | chr1:2041904<br>84 | NM_002256.3:c<br>.417A>G       | NP_002247.3:p.Ter139TrpextTer41 | rs1429366684 |  | stop lost                     | -                                                                    |
| <b>LRR C6</b>  | chr8:1325723<br>16 | NM_001321961<br>.1:c.1331C>T   | NP_001308890.1:p.Pro444Leu      | rs139131485  |  | missense<br>variant           | Likel<br>y<br>benig<br>n or<br>Unce<br>rtain<br>signif<br>icanc<br>e |
| <b>NR5A1</b>   | chr9:1244911<br>56 | NM_004959.4:c<br>.1063G>A      | NP_004950.2:p.Val355Met         | rs371701248  |  | missense<br>variant           | -                                                                    |
| <b>NR5A1</b>   | chr9:1244911<br>67 | NM_004959.4:c<br>.1052C>T      | NP_004950.2:p.Ala351Val         | rs759071081  |  | missense<br>variant           | -                                                                    |
| <b>NSMF</b>    | chr9:1374577<br>58 | NM_001130969<br>.1:c.277G>A    | NP_001124441.1:p.Ala93Thr       | rs753078916  |  | missense<br>variant           | -                                                                    |
| <b>NSMF</b>    | chr9:1374527<br>68 | NM_001130969<br>.1:c.1099C>T   | NP_001124441.1:p.Arg367Trp      | rs772028925  |  | missense<br>variant           | -                                                                    |
| <b>PATL2</b>   | chr15:446698<br>39 | NM_001145112<br>.1:c.814G>A    | NP_001138584.1:p.Val272Met      | rs140098598  |  | missense<br>variant           | -                                                                    |
| <b>PLK4</b>    | chr4:1278811<br>51 | NM_014264.4:c<br>.17G>A        | NP_055079.3:p.Gly6Glu           | rs149003893  |  | missense<br>variant           | Unce<br>rtain<br>signif<br>icanc<br>e                                |
| <b>SEPT12</b>  | chr16:477790<br>7  | NM_001154458<br>.2:c.829C>T    | NP_001147930.1:p.Arg277Cys      | rs764712886  |  | missense<br>variant           | -                                                                    |
| <b>TEX11</b>   | chrX:7055469<br>8  | NM_001003811<br>.1:c.2288T>C   | NP_001003811.1:p.Val763Ala      | rs200139216  |  | missense<br>variant           | -                                                                    |
| <b>TEX11</b>   | chrX:7074418<br>1  | NM_001003811<br>.1:c.776C>T    | NP_001003811.1:p.Thr259Ile      | rs762957753  |  | missense<br>variant           | -                                                                    |
| <b>TUBB8</b>   | chr10:47485        | NM_177987.2:c<br>.907T>C       | NP_817124.1:p.Cys303Arg         |              |  | missense<br>variant           | -                                                                    |
| <b>USP9Y</b>   | chrY:1272218<br>9  | NM_004654.3:c<br>.325+2T>C     | -                               |              |  | Splice<br>donor<br>variant    | -                                                                    |
| <b>ZMYND10</b> | chr3:5034182<br>6  | NM_015896.3:c<br>.1105C>T      | NP_056980.2:p.Arg369Trp         | rs142613783  |  | missense<br>variant           | Benig<br>n                                                           |

**Table S2.** List of defects of primary spermatogenesis due to mutation in single genes and their genetic etiology.

| Location | Gene                 | Inheritance | OMIM # Gene | Phenotype                          | Spermatogenic Defect                                                  | OMIM# Phenotype /HGMD Reference             |
|----------|----------------------|-------------|-------------|------------------------------------|-----------------------------------------------------------------------|---------------------------------------------|
| 19q13.43 | <i>AURKC (STK13)</i> | AR          | 603495      | Spermatogenic failure 5            | Large-headed, multiflagellar, polyploid spermatozoa (Macrozoospermia) | 243060                                      |
| 1p22.1   | <i>BRDT</i>          | AR          | 602144      | Spermatogenic failure 21           | Acephalic spermatozoa syndrome                                        | 617644                                      |
| 11q13.1  | <i>CATSPE R1</i>     | AR          | 606389      | Spermatogenic failure 7            | Asthenozoospermia                                                     | 612997                                      |
| 10q25.1  | <i>CFAP43</i>        | AR          | 617558      | Spermatogenic failure 19           | MMAF                                                                  | 617592                                      |
| 3q13.2   | <i>CFAP44</i>        | AR          | 617559      | Spermatogenic failure 20           | MMAF                                                                  | 617593                                      |
| 3p21.1   | <i>DNAH1</i>         | AR          | 603332      | Spermatogenic failure 18           | MMAF                                                                  | 617576                                      |
| 12q14.2  | <i>DPY19L2</i>       | AR          | 613893      | Spermatogenic failure 9            | Globozoospermia                                                       | 613958                                      |
| 6q22.31  | <i>HSF2</i>          | AD          | 140581      | -                                  | Idiopathic azoospermia                                                | Mou et al (2013)                            |
| 17q21.2  | <i>KLHL10</i>        | AD          | 608778      | Spermatogenic failure 11           | OZS; Teratozoospermia; AZS                                            | 615081                                      |
| 16p13.3  | <i>MEIOB</i>         | AR          | 617670      | Spermatogenic failure 22           | Azoospermia, non-obstructive                                          | 617706                                      |
| 10q26.11 | <i>NANOS1</i>        | AD          | 608226      | Spermatogenic failure 12           | Azoospermia/ Oligozoospermia/ Oligoasthenoteratozoospermia            | 615413                                      |
| 9q33.3   | <i>NR5A1</i>         | AR          | 184757      | Spermatogenic failure 8            | Azoospermia/ Oligozoospermia                                          | 613957                                      |
| 22q13.1  | <i>PICK1</i>         |             | 605926      | -                                  | Globozoospermia                                                       | Liu et al (2010)                            |
| 12p12.3  | <i>PLCZ1</i>         | AR          | 608075      | Spermatogenic failure 17           | Male infertility due to oocyte activation failure                     | 617214                                      |
| 4q28.1   | <i>PLK4</i>          | AD          | 605031      | -                                  | Azoospermia Sertoli cell-only                                         | Miyamoto et al (2016)                       |
| 6p21.31  | <i>SEPT12</i>        | AD          | 611562      | Spermatogenic failure 10           | Asthenozoospermia, oligoasthenozoospermia e Teratozoospermia          | 614822                                      |
| 9q34.3   | <i>SLC26A8</i>       | AD          | 608480      | Spermatogenic failure 3            | Asthenozoospermia                                                     | 617187                                      |
| 3q26.31  | <i>SOHLH1</i>        | -           | 610224      | -                                  | Azoospermia, non-obstructive                                          | Choi et al (2010)                           |
| 20q11.21 | <i>SPATA16</i>       | AR          | 609856      | Spermatogenic failure 6            | Globozoospermia                                                       | 102530                                      |
| 10q26.3  | <i>SUN5</i>          | AR          | 613942      | Spermatogenic failure 16           | Acephalic spermatozoa syndrome                                        | 617187                                      |
| 12q23.2  | <i>SYCE1</i>         | AR          | 611486      | Spermatogenic failure 15           | Azoospermia, non-obstructive                                          | 616950                                      |
| 18q11.2  | <i>SYCP3</i>         | AD          | 604759      | Spermatogenic failure 4            | Azoospermia/ Oligozoospermia                                          | 270960                                      |
| Xp11.1   | <i>TAF4B</i>         | AR          | 601689      | Spermatogenic failure 13           | Azoospermia/ Oligozoospermia                                          | 615841                                      |
| 8p12     | <i>TEX11</i>         | XLR         | 300311      | Spermatogenic failure, X-linked, 2 | Azoospermia                                                           | 309120                                      |
| Yq11.22  | <i>TEX15</i>         | AR          | 605795      | -                                  | Azoospermia/ Oligozoospermia                                          | Okutman (2015); Colombo (2017); Wang (2017) |
| 17p13.2  | <i>USP9Y</i>         | YL          | 400005      | Spermatogenic failure, Y-linked, 2 | Azoospermia, non-obstructive                                          | 415000                                      |

|              |             |    |        |                             |                             |                       |
|--------------|-------------|----|--------|-----------------------------|-----------------------------|-----------------------|
| 7p12<br>.2   | ZMYND<br>15 | AR | 614312 | Spermatogenic<br>failure 14 | Azoospermia/Oligozoospermia | 615842                |
| 19q1<br>3.43 | ZBPB        | -  | 608498 | -                           | Teratozoospermia            | Yatsenko et al (2012) |

OZS: oligozoospermia; AZS: asthenozoospermia; MMAF: Multiple Morphological Abnormalities of the Flagella; AR = autosomal recessive; AD = autosomal dominant; XLR= X-linked, recessive; YL: Y-linked.

**Table S3.** List of hypogonadotropic hypogonadism and their genetic etiology.

| Location | Phenotype                                                                          | OMIM# Phenotype / HGMD Reference | Inheritance | Gene         | OMIM# Gene |
|----------|------------------------------------------------------------------------------------|----------------------------------|-------------|--------------|------------|
| Xp22.31  | Hypogonadotropic hypogonadism, 1 with or without anosmia (Kallmann syndrome 1, KS) | 308700                           | XLR         | ANOS1 (KAL1) | 300836     |
| 19q13.2  | Hypogonadotropic hypogonadism                                                      | Salian-Mehta (2014)              | -           | AXL          | 109135     |
| 2q31.2   | Kallmann syndrome                                                                  | Hutchins [2016]                  | -           | CCDC141      | 616031     |
| 8q12.2   | Hypogonadotropic hypogonadism, 5 with or without anosmia                           | 612370                           | AD          | CHD7         | 608892     |
| 12q21.33 | Hypogonadotropic hypogonadism, 19 with or without anosmia                          | 615269                           | AD          | DUSP6        | 602748     |
| 7q31.32  | Hypogonadotropic hypogonadism, with or without anosmia                             | 616030                           | AR          | FEZF1        | 613301     |
| 8p21.3   | Hypogonadotropic hypogonadism, 20 with or without anosmia                          | 615270                           | AD          | FGF17        | 603725     |
| 10q24.32 | Hypogonadotropic hypogonadism, 6 with or without anosmia                           | 612702                           | AD          | FGF8         | 600483     |
| 8p11.23  | Hypogonadotropic hypogonadism, 2 with or without anosmia                           | 147950                           | AD          | FGFR1        | 136350     |
| 20p12.1  | Hypogonadotropic hypogonadism, 21 with anosmia                                     | 615271                           | AD          | FLRT3        | 604808     |
| 11p14.1  | Hypogonadotropic hypogonadism, 24 without anosmia                                  | 229070                           | AR          | FSHB         | 136530     |
| 8p21.2   | Hypogonadotropic hypogonadism, 12 with or without anosmia                          | 614841                           | AR          | GNRH1        | 152760     |
| 4q13.2   | Hypogonadotropic hypogonadism, 7 without anosmia                                   | 146110                           | AR          | GNRHR        | 138850     |
| 2q14.3   | Hypogonadotropic hypogonadism, 15 with or without anosmia                          | 614880                           | AD          | HS6ST1       | 604846     |

|          |                                                           |                                |    |               |        |
|----------|-----------------------------------------------------------|--------------------------------|----|---------------|--------|
| 3p14.3   | Hypogonadotropic hypogonadism, 18 with or without anosmia | 615267                         | AD | <i>IL17RD</i> | 606807 |
| 1q32.1   | Hypogonadotropic hypogonadism, 13 with or without anosmia | 614842                         | AR | <i>KISS1</i>  | 603286 |
| 19p13.3  | Hypogonadotropic hypogonadism, 8 with or without anosmia  | 614837                         | AR | <i>KISS1R</i> | 604161 |
| 19q13.33 | Hypogonadotropic hypogonadism, 23 with or without anosmia | 228300                         | AR | <i>LHB</i>    | 152780 |
| 9q34.3   | Hypogonadotropic hypogonadism, 9 with or without anosmia  | 614838                         | AD | <i>NSMF</i>   | 608137 |
| 3p13     | Hypogonadotropic hypogonadism, 4 with or without anosmia  | 610628                         | AD | <i>PROK2</i>  | 607002 |
| 20p12.3  | Hypogonadotropic hypogonadism, 3 with or without anosmia  | 244200                         | AD | <i>PROKR2</i> | 607123 |
| 7q21.11  | Hypogonadotropic hypogonadism, 16 with or without anosmia | 614897                         | AD | <i>SEMA3A</i> | 603961 |
| 7q21.11  | Kallmann syndrome                                         | Cariboni (2015)                | -  | <i>SEMA3E</i> | 608166 |
| 9q34.3   | Hypergonadotropic hypogonadism, nonsyndromic              | Bayram (2015)                  | -  | <i>SOHLH1</i> | 610224 |
| 22q13.1  | Kallmann syndrome, with or without deafness               | Pingault (2013); Marcos (2014) | -  | <i>SOX10</i>  | 602229 |
| 5q31.3   | Hypogonadotropic hypogonadism, 17 with or without anosmia | 615266                         | AD | <i>SPRY4</i>  | 607984 |
| 5q31.3   | Hypogonadotropic hypogonadism                             | Kotan (2016)                   | -  | <i>SRA1</i>   | 603819 |
| 12q13.3  | Hypogonadotropic hypogonadism, 10 with or without anosmia | 614839                         | AR | <i>TAC3</i>   | 162330 |
| 4q24     | Hypogonadotropic hypogonadism, 11 with or without anosmia | 614840                         | AR | <i>TACR3</i>  | 162332 |
| 10q26.12 | Hypogonadotropic hypogonadism, 14 with or without anosmia | 614858                         | AD | <i>WDR11</i>  | 606417 |

HGMD = Human Gene Mutation Database (<https://portal.biobase-international.com/hgmd/pro/start.php?>); AR = Autosomal recessive; AD = autosomal dominant; XLR= X-linked, recessive.

**Table S4.** List of primary ciliary dyskinesia and their genetic etiology.

| Location      | Phenotype                                                               | OMIM# Phenotype / HGMD Reference / Reference | Inheritance | Gene                      | OMIM# Gene |
|---------------|-------------------------------------------------------------------------|----------------------------------------------|-------------|---------------------------|------------|
| 10p12.1       | Ciliary dyskinesia, primary, 23                                         | 615451                                       | AR          | <i>ARMC4</i>              | 615408     |
| 21q22.11      | Ciliary dyskinesia, primary, 26                                         | 615500                                       | AR          | <i>CFAP298</i>            | 615494     |
| 3p14.2        | Ciliary dyskinesia, primary                                             | Abouelhoda (2016)                            | -           | <i>CFAP20DC (C3orf67)</i> | -          |
| 17q21.31      | Ciliary dyskinesia, primary, 17                                         | 614679                                       | AR          | <i>CCDC103</i>            | 614677     |
| 19q13.33      | Ciliary dyskinesia, primary, 20                                         | 615067                                       | AR          | <i>CCDC114</i>            | 615038     |
| 19p13.2       | Ciliary dyskinesia, primary, 30                                         | 616037                                       | AR          | <i>CCDC151</i>            | 615956     |
| 3q26.33       | Ciliary dyskinesia, primary, 14                                         | 613807                                       | -           | <i>CCDC39</i>             | 613798     |
| 17q25.3       | Ciliary dyskinesia, primary, 15                                         | 613808                                       | -           | <i>CCDC40</i>             | 613799     |
| 12q13.12      | Ciliary dyskinesia, primary, 27                                         | 615504                                       | AR          | <i>CCDC65</i>             | 611088     |
| 5q11.2        | Ciliary dyskinesia, primary, 29                                         | 615872                                       | AR          | <i>CCNO</i>               | 607752     |
| 1q41          | Ciliopathy & microcephaly                                               | Waters (2015)                                | -           | <i>CENPF</i>              | 600236     |
| 16q23.3-q24.1 | Ciliary dyskinesia, primary, 13                                         | 613193                                       | AR          | <i>DNAAF1</i>             | 613190     |
| 14q21.3       | Ciliary dyskinesia, primary, 10                                         | 612518                                       | -           | <i>DNAAF2</i>             | 612517     |
| 19q13.42      | Ciliary dyskinesia, primary, 2                                          | 606763                                       | AR          | <i>DNAAF3</i>             | 614566     |
| 15q21.3       | Ciliary dyskinesia, primary, 25                                         | 615482                                       | AR          | <i>DNAAF4</i>             | 608706     |
| Unknown       | Ciliary dyskinesia, primary, 18                                         | 614874                                       | AR          | <i>DNAAF5</i>             | 614864     |
| 3p21.1        | Ciliary dyskinesia, primary, 37                                         | 617577                                       | AR          | <i>DNAH1</i>              | 603332     |
| 7p15.3        | Ciliary dyskinesia, primary, 7, with or without situs inversus          | 611884                                       | AR          | <i>DNAH11</i>             | 603339     |
| 5p15.2        | Ciliary dyskinesia, primary, 3, with or without situs inversus          | 608644                                       | -           | <i>DNAH5</i>              | 603335     |
| 6p21.2        | Stromme syndrome; Ciliary dyskinesia, primary                           | 243605                                       | -           | <i>DNAH8</i>              | 603337     |
| 9p13.3        | Ciliary dyskinesia, primary, 1, with or without situs inversus          | 244400                                       | AR          | <i>DNAI1</i>              | 604366     |
| 17q25.1       | Ciliary dyskinesia, primary, 9, with or without situs inversus          | 612444                                       | -           | <i>DNAI2</i>              | 605483     |
| 11q13.4       | Ciliary dyskinesia, primary, 34                                         | 617091                                       | AR          | <i>DNAJB13</i>            | 610263     |
| 14q24.3       | Ciliary dyskinesia, primary, 16                                         | 614017                                       | AR          | <i>DNAL1</i>              | 610062     |
| 2p23.3        | Ciliary dyskinesia, primary, 21                                         | 615294                                       | AR          | <i>DRC1</i>               | 615288     |
| 16q24.3       | Ciliary dyskinesia, primary, 33                                         | 616726                                       | AR          | <i>GAS8</i>               | 605178     |
| 16q22.2       | Ciliary dyskinesia, primary, 5                                          | 608647                                       | AR          | <i>HYDIN</i>              | 610812     |
| 8q24.22       | Ciliary dyskinesia, primary, 19                                         | 614935                                       | AR          | <i>LRRC6</i>              | 614930     |
| 5q11.2        | Reduced generation of multiple motile cilia; Primary ciliary dyskinesia | Boon (2014); Maddirevula (2018)              | -           | <i>MCIDAS</i>             | 614086     |
| 7p14.1        | Ciliary dyskinesia, primary, 6                                          | 610852                                       | AR          | <i>NME8</i>               | 607421     |
| Xq22.3        | Ciliary dyskinesia, primary, 36, X-linked                               | 300991                                       | XLR         | <i>DNAAF6 (PIH1D3)</i>    | 300933     |
| 21q22.3       | Ciliary dyskinesia, primary, 24                                         | 615481                                       | AR          | <i>RSPH1</i>              | 609314     |
| 6q25.3        | Ciliary dyskinesia, primary, 32                                         | 616481                                       | AR          | <i>RSPH3</i>              | 615876     |
| 6q22.1        | Ciliary dyskinesia, primary, 11                                         | 612649                                       | -           | <i>RSPH4A</i>             | 612647     |
| 6p21.1        | Ciliary dyskinesia, primary, 12                                         | 612650                                       | -           | <i>RSPH9</i>              | 612648     |
| 8q22.2        | Ciliary dyskinesia, primary, 28                                         | 615505                                       | AR          | <i>SPAG1</i>              | 603395     |
| 2q35          | Primary ciliary dyskinesia                                              | Edelbusch (2017)                             | -           | <i>STK36</i>              | 607652     |
| 17q21.2       | Ciliary dyskinesia, primary, 35                                         | 617092                                       | AR          | <i>TTC25</i>              | 617095     |
| 3p21.31       | Ciliary dyskinesia, primary, 22                                         | 615444                                       | AR          | <i>ZMYND10</i>            | 607070     |

HGMD = Human Gene Mutation Database (<https://portal.biobase-international.com/hgmd/pro/start.php?>); AR = Autosomal recessive; AD = autosomal dominant; XLR= X-linked, recessive.

**Table S5.** List of androgen insensitivity and their genetic etiology.

| Location | Phenotype              | OMIM# Phenotype / HGMD Reference | Inheritance | Gene | OMIM# Gene |
|----------|------------------------|----------------------------------|-------------|------|------------|
| Xq12     | Androgen insensitivity | 300068                           | XLR         | AR   | 313700     |

XLR= X-linked, recessive.

**Table S6.** List of congenital hypopituitarism and their genetic etiology.

| Location | Phenotype                    | OMIM# Phenotype / HGMD Reference | Inheritance | Gene          | OMIM# Gene |
|----------|------------------------------|----------------------------------|-------------|---------------|------------|
| 5q35.3   | CPHD, 2; Panhypopituitarism  | 262600                           | AR          | <i>PROP1</i>  | 601538     |
| Xq27.1   | Panhypopituitarism, X-linked | 312000                           | XL          | <i>SOX3</i>   | 313430     |
| 3p11.2   | CPHD, 1                      | 613038                           | AR, AD      | <i>POU1F1</i> | 173110     |
| 3p14.3   | CPHD, 5                      | 182230                           | AR, AD      | <i>HESX1</i>  | 601802     |
| 1q25.2   | CPHD, 4                      | 262700                           | AD          | <i>LHX4</i>   | 602146     |
| 9q34.3   | CPHD, 3                      | 221750                           | AR          | <i>LHX3</i>   | 600577     |
| 14q22.3  | CPHD, 6                      | 613986                           | AD          | <i>OTX2</i>   | 600037     |
| 2q14.2   | CPHD                         | Babu (2019)                      | -           | <i>GLI2</i>   | 165230     |

HGMD = Human Gene Mutation Database (<https://portal.biobase-international.com/hgmd/pro/start.php?>); CPHD= Pituitary hormone deficiency, combined; AR = autosomal recessive; AD = autosomal dominant.
